# Supplementary material for: Naphthenic Acids Aggregation: The Role of Salinity
Source: MDPI journal article supplement (doi:10.3390/computation10100170), 2022-09-22
Supplement: s1 [file s1]

# Naphthenic acids aggregation: the salinity role

Renato D. Cunha<sup>1,2</sup>, Livia J. Ferreira<sup>3</sup>, Ednilsom Orestes<sup>3,4</sup>, Mauricio D. Coutinho-Neto<sup>3</sup>, James M. de Almeida<sup>5</sup>, Rogério M. Carvalho<sup>6</sup>, Cleiton D. Maciel<sup>7</sup>, Carles Curutchet<sup>1,2</sup> and Paula Homem-de-Mello<sup>3\*</sup>

<sup>1</sup> Departament de Farmàcia i Tecnologia Farmacèutica, i Fisicoquímica, Facultat de Farmàcia i Ciències de l'Alimentació, Universitat de Barcelona (UB), Barcelona, Spain

<sup>2</sup> Institut de Química Teòrica i Computacional (IQTUB), Universitat de Barcelona (UB), Barcelona, Spain

<sup>3</sup> Center of Natural Sciences and Humanities, Federal University of ABC, Santo André, SP, Brazil

<sup>4</sup> Departamento de Ciências Exatas, Escola de Engenharia Industrial Metalúrgica de Volta Redonda, Universidade Federal Fluminense, Volta Redonda, RJ, Brazil

<sup>5</sup> Ilum School of Science (CNPEM), Campinas, SP, Brazil

<sup>6</sup> Research and Development Center, Leopoldo A. M. de Mello, Petrobras, Rio de Janeiro, RJ, Brazil

<sup>7</sup> Federal Institute of São Paulo, São Paulo, SP, Brazil

\* Correspondence: [paula.mello@ufabc.edu.br](mailto:paula.mello@ufabc.edu.br)

## Table of Contents

**Table S1.** RESP atomic charges calculated at B3LYP/6-31G(d) level of theory for the following naphthenic acids: c9, c10 aromatic, and c10

**Table S2.** RESP atomic charges calculated at B3LYP/6-31G(d) level of theory for the following naphthenic acids: c11, c12, and c14

**Table S1.** RESP atomic charges calculated at B3LYP/6-31G(d) level of theory for the following naphthenic acids: c9, c10 aromatic, and c10

| c9                                                                                |      |           | c10 aromatic                                                                       |      |           | c10                                                                                 |      |           |
|-----------------------------------------------------------------------------------|------|-----------|------------------------------------------------------------------------------------|------|-----------|-------------------------------------------------------------------------------------|------|-----------|
| 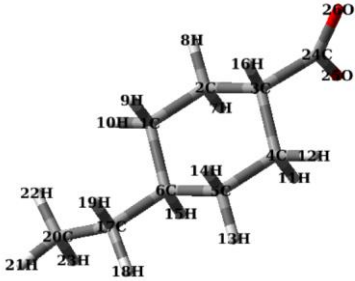 |      |           |  |      |           |  |      |           |
| Number                                                                            | Atom | Charge    | Number                                                                             | Atom | Charge    | Number                                                                              | Atom | Charge    |
| 1                                                                                 | C    | -0.167494 | 1                                                                                  | C    | -0.251181 | 1                                                                                   | C    | -0.001402 |
| 2                                                                                 | C    | -0.028534 | 2                                                                                  | C    | -0.160937 | 2                                                                                   | C    | -0.162156 |
| 3                                                                                 | C    | -0.006693 | 3                                                                                  | C    | 0.027371  | 3                                                                                   | C    | 0.197740  |
| 4                                                                                 | C    | 0.026446  | 4                                                                                  | C    | -0.160941 | 4                                                                                   | C    | -0.208623 |
| 5                                                                                 | C    | -0.236659 | 5                                                                                  | C    | -0.251168 | 5                                                                                   | C    | -0.012830 |
| 6                                                                                 | C    | 0.231850  | 6                                                                                  | C    | 0.112259  | 6                                                                                   | C    | -0.019509 |
| 7                                                                                 | H    | 0.014470  | 7                                                                                  | H    | 0.132425  | 7                                                                                   | H    | 0.037095  |
| 8                                                                                 | H    | 0.014080  | 8                                                                                  | H    | 0.135977  | 8                                                                                   | H    | 0.007755  |
| 9                                                                                 | H    | 0.038711  | 9                                                                                  | H    | 0.135974  | 9                                                                                   | H    | 0.011158  |
| 10                                                                                | H    | 0.016052  | 10                                                                                 | H    | 0.132413  | 10                                                                                  | H    | 0.010938  |
| 11                                                                                | H    | 0.004014  | 11                                                                                 | C    | -0.250655 | 11                                                                                  | H    | 0.058774  |
| 12                                                                                | H    | 0.007674  | 12                                                                                 | H    | 0.063027  | 12                                                                                  | H    | 0.021905  |
| 13                                                                                | H    | 0.020276  | 13                                                                                 | H    | 0.063018  | 13                                                                                  | H    | 0.014693  |
| 14                                                                                | H    | 0.043758  | 14                                                                                 | C    | 0.298821  | 14                                                                                  | H    | 0.015791  |
| 15                                                                                | H    | 0.003880  | 15                                                                                 | H    | -0.046560 | 15                                                                                  | H    | -0.019779 |
| 16                                                                                | H    | -0.024756 | 16                                                                                 | H    | -0.046556 | 16                                                                                  | H    | 0.019884  |
| 17                                                                                | C    | -0.048266 | 17                                                                                 | C    | -0.283672 | 17                                                                                  | C    | -0.315942 |
| 18                                                                                | H    | 0.006807  | 18                                                                                 | H    | 0.053675  | 18                                                                                  | H    | 0.064195  |
| 19                                                                                | H    | 0.008679  | 19                                                                                 | H    | 0.045982  | 19                                                                                  | H    | 0.062983  |
| 20                                                                                | C    | -0.210358 | 20                                                                                 | H    | 0.053671  | 20                                                                                  | C    | 0.249618  |
| 21                                                                                | H    | 0.045190  | 21                                                                                 | C    | 0.772043  | 21                                                                                  | H    | -0.024245 |
| 22                                                                                | H    | 0.049637  | 22                                                                                 | O    | -0.787482 | 22                                                                                  | H    | -0.042026 |
| 23                                                                                | H    | 0.039771  | 23                                                                                 | O    | -0.787506 | 23                                                                                  | C    | 0.775160  |

Table S1. Continuation

| c9                                                                                |      |           | c10 aromatic                                                                       |      |        | c10                                                                                 |      |           |
|-----------------------------------------------------------------------------------|------|-----------|------------------------------------------------------------------------------------|------|--------|-------------------------------------------------------------------------------------|------|-----------|
| 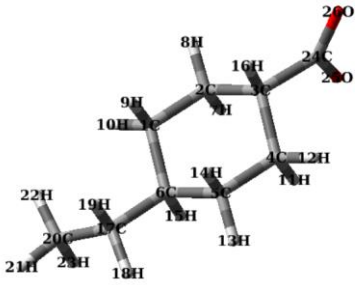 |      |           |  |      |        |  |      |           |
| Number                                                                            | Atom | Charge    | Number                                                                             | Atom | Charge | Number                                                                              | Atom | Charge    |
| 24                                                                                | C    | 0.773794  |                                                                                    |      |        | 24                                                                                  | O    | -0.805845 |
| 25                                                                                | O    | -0.805989 |                                                                                    |      |        | 25                                                                                  | O    | -0.814994 |
| 26                                                                                | O    | -0.816340 |                                                                                    |      |        | 26                                                                                  | C    | -0.293774 |
|                                                                                   |      |           |                                                                                    |      |        | 27                                                                                  | H    | 0.047526  |
|                                                                                   |      |           |                                                                                    |      |        | 28                                                                                  | H    | 0.062770  |
|                                                                                   |      |           |                                                                                    |      |        | 29                                                                                  | H    | 0.063139  |

**Table S2.** RESP atomic charges calculated at B3LYP/6-31G(d) level of theory for the following naphthenic acids: c11, c12, and c14

| c11                                                                               |      |           | c12                                                                                |      |           | c14                                                                                 |      |           |
|-----------------------------------------------------------------------------------|------|-----------|------------------------------------------------------------------------------------|------|-----------|-------------------------------------------------------------------------------------|------|-----------|
| 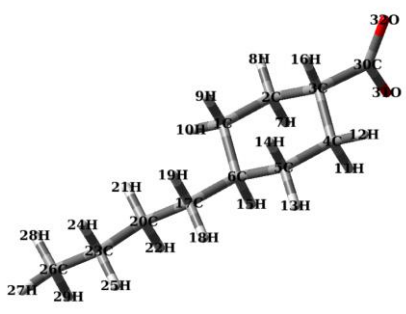 |      |           |  |      |           |  |      |           |
| Number                                                                            | Atom | Charge    | Number                                                                             | Atom | Charge    | Number                                                                              | Atom | Charge    |
| 1                                                                                 | C    | -0.173376 | 1                                                                                  | C    | -0.160171 | 1                                                                                   | C    | -0.188281 |
| 2                                                                                 | C    | -0.096153 | 2                                                                                  | C    | -0.092753 | 2                                                                                   | C    | 0.388412  |
| 3                                                                                 | C    | -0.010239 | 3                                                                                  | C    | -0.009983 | 3                                                                                   | C    | -0.208046 |
| 4                                                                                 | C    | -0.052278 | 4                                                                                  | C    | -0.032837 | 4                                                                                   | C    | -0.064812 |
| 5                                                                                 | C    | -0.176786 | 5                                                                                  | C    | -0.164015 | 5                                                                                   | C    | -0.009860 |
| 6                                                                                 | C    | 0.399296  | 6                                                                                  | C    | 0.315011  | 6                                                                                   | C    | -0.004867 |
| 7                                                                                 | H    | 0.029798  | 7                                                                                  | H    | 0.029821  | 7                                                                                   | H    | 0.015642  |
| 8                                                                                 | H    | 0.037838  | 8                                                                                  | H    | 0.035438  | 8                                                                                   | H    | -0.017991 |
| 9                                                                                 | H    | 0.045842  | 9                                                                                  | H    | 0.044460  | 9                                                                                   | H    | 0.035834  |
| 10                                                                                | H    | 0.007865  | 10                                                                                 | H    | 0.009024  | 10                                                                                  | H    | 0.008794  |
| 11                                                                                | H    | 0.019624  | 11                                                                                 | H    | 0.015114  | 11                                                                                  | H    | 0.021971  |
| 12                                                                                | H    | 0.025131  | 12                                                                                 | H    | 0.018775  | 12                                                                                  | H    | 0.032498  |
| 13                                                                                | H    | 0.008737  | 13                                                                                 | H    | 0.005420  | 13                                                                                  | H    | -0.024698 |
| 14                                                                                | H    | 0.035408  | 14                                                                                 | H    | 0.030914  | 14                                                                                  | H    | 0.006910  |
| 15                                                                                | H    | -0.025522 | 15                                                                                 | H    | -0.010804 | 15                                                                                  | H    | 0.011561  |
| 16                                                                                | H    | -0.018562 | 16                                                                                 | H    | -0.018834 | 16                                                                                  | H    | 0.055075  |
| 17                                                                                | C    | -0.465341 | 17                                                                                 | C    | 0.783065  | 17                                                                                  | C    | -0.477864 |
| 18                                                                                | H    | 0.075356  | 18                                                                                 | O    | -0.804838 | 18                                                                                  | H    | 0.082314  |
| 19                                                                                | H    | 0.072634  | 19                                                                                 | O    | -0.816805 | 19                                                                                  | H    | 0.079556  |
| 20                                                                                | C    | 0.154635  | 20                                                                                 | C    | -0.323646 | 20                                                                                  | C    | 0.178768  |
| 21                                                                                | H    | -0.019003 | 21                                                                                 | H    | 0.051354  | 21                                                                                  | H    | -0.021685 |
| 22                                                                                | H    | -0.030653 | 22                                                                                 | H    | 0.051602  | 22                                                                                  | H    | -0.035042 |

Table S2. Continuation

| c11                                                                               |      |           | c12                                                                                |      |           | c14                                                                                 |      |           |
|-----------------------------------------------------------------------------------|------|-----------|------------------------------------------------------------------------------------|------|-----------|-------------------------------------------------------------------------------------|------|-----------|
| 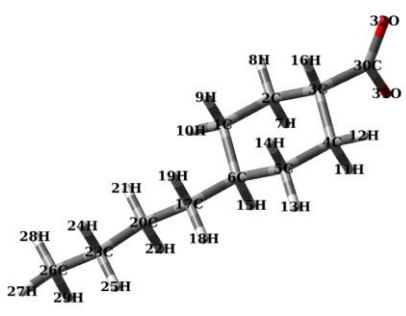 |      |           |  |      |           |  |      |           |
| Number                                                                            | Atom | Charge    | Number                                                                             | Atom | Charge    | Number                                                                              | Atom | Charge    |
| 23                                                                                | C    | 0.204863  | 23                                                                                 | C    | 0.101622  | 23                                                                                  | C    | 0.117354  |
| 24                                                                                | H    | -0.033065 | 24                                                                                 | H    | -0.015480 | 24                                                                                  | H    | -0.023614 |
| 25                                                                                | H    | -0.036055 | 25                                                                                 | H    | -0.024728 | 25                                                                                  | H    | -0.026453 |
| 26                                                                                | C    | -0.373734 | 26                                                                                 | C    | -0.020835 | 26                                                                                  | C    | -0.154355 |
| 27                                                                                | H    | 0.076604  | 27                                                                                 | H    | 0.004461  | 27                                                                                  | H    | 0.012614  |
| 28                                                                                | H    | 0.077091  | 28                                                                                 | H    | 0.003104  | 28                                                                                  | H    | 0.015285  |
| 29                                                                                | H    | 0.076527  | 29                                                                                 | C    | 0.168439  | 29                                                                                  | C    | 0.050606  |
| 30                                                                                | C    | 0.786244  | 30                                                                                 | H    | -0.032621 | 30                                                                                  | H    | -0.015032 |
| 31                                                                                | O    | -0.805046 | 31                                                                                 | H    | -0.033290 | 31                                                                                  | H    | -0.016624 |
| 32                                                                                | O    | -0.817673 | 32                                                                                 | C    | -0.262481 | 32                                                                                  | C    | 0.229540  |
|                                                                                   |      |           | 33                                                                                 | H    | 0.051512  | 33                                                                                  | H    | -0.040343 |
|                                                                                   |      |           | 34                                                                                 | H    | 0.054215  | 34                                                                                  | H    | -0.039762 |
|                                                                                   |      |           | 35                                                                                 | H    | 0.050771  | 35                                                                                  | C    | -0.347770 |
|                                                                                   |      |           |                                                                                    |      |           | 36                                                                                  | H    | 0.074338  |
|                                                                                   |      |           |                                                                                    |      |           | 37                                                                                  | H    | 0.071032  |
|                                                                                   |      |           |                                                                                    |      |           | 38                                                                                  | H    | 0.071214  |
|                                                                                   |      |           |                                                                                    |      |           | 39                                                                                  | C    | 0.776268  |
|                                                                                   |      |           |                                                                                    |      |           | 40                                                                                  | O    | -0.803477 |
|                                                                                   |      |           |                                                                                    |      |           | 41                                                                                  | O    | -0.815010 |
